# Supplementary material for: Mapping the glycosyltransferase fold landscape using interpretable deep learning
Source: PubMed Central journal article supplement (PMC8476585; doi:10.1038/s41467-021-25975-9), 2021-09-27
Supplement: 41467_2021_25975_MOESM3_ESM.pdf [file 41467_2021_25975_MOESM3_ESM.pdf]

### **Description of Additional Supplementary Files**

File Name: Supplementary Data 1

Description: List of GenBank IDs for all the GT sequences used in this study.
